# Supplementary material for: Examining the antimicrobial activity and toxicity to animal cells of different types of CO-releasing molecules
Source: Royal Society of Chemistry journal article supplement (doi:10.1039/c5dt02238j), 2015-12-03
Supplement: c5dt02238j1.pdf [file c5dt02238j1.pdf]

Supplementary Tables

Table S1. Properties of the CORMs used in this study

| CORM                                                           | Structure                                                                           | MM (g/mol) | Solvent            | Stability                                                                             | Refs. |
|----------------------------------------------------------------|-------------------------------------------------------------------------------------|------------|--------------------|---------------------------------------------------------------------------------------|-------|
| CORM-2 <sup>a</sup>                                            | 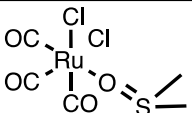   | 512        | DMSO               | unstable in H <sub>2</sub> O                                                          | 1, 2  |
| CORM-3                                                         |    | 295        | H <sub>2</sub> O   | unstable in H <sub>2</sub> O                                                          | 3-5   |
| ALF850                                                         |    | 341        | DMSO               | unstable in H <sub>2</sub> O                                                          | 6-8   |
| ALF062                                                         |   | 446        | CH <sub>3</sub> OH | unstable in aerobic or anaerobic H <sub>2</sub> O                                     | 9     |
| ALF153                                                         |  | 235        | H <sub>2</sub> O   | stable in aerobic H <sub>2</sub> O for >6 h                                           | 9     |
| ALF186                                                         |  | 357        | H <sub>2</sub> O   | stable in anaerobic H <sub>2</sub> O for >6 h<br>unstable in aerobic H <sub>2</sub> O | 10    |
| [(Fe(SBPy <sub>3</sub> )(CO))(BF <sub>4</sub> ) <sub>2</sub> ] |  | 589        | H <sub>2</sub> O   | replacement of CO by H <sub>2</sub> O in aerobic or anaerobic H <sub>2</sub> O        | 11    |

a) [Ru(CO)<sub>3</sub>Cl<sub>2</sub>]<sub>2</sub> in DMSO solution.

## Supplementary Figures

Figure S1

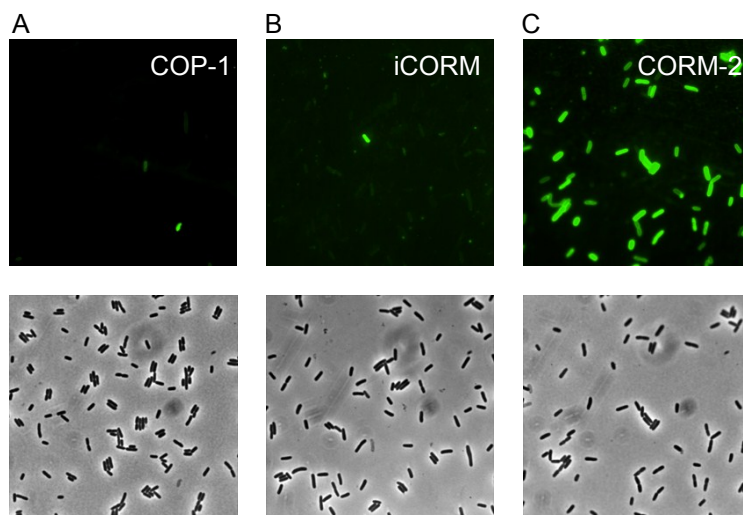

**Figure S1. Fluorescence microscopy images of *E. coli* cells exposed to CORM-2**

*E. coli* cells were left untreated (A) and treated, for 15 min, with 500  $\mu$ M iCORM (B) or CORM-2 (C) and exposed to 1  $\mu$ M COP-1. Fluorescence images that were acquired with a FITC filter are shown in the upper panels and the correspondent bright-field images are depicted in the lower panels (100x objective).

## References

1. R. Motterlini, J. E. Clark, R. Foresti, P. Sarathchandra, B. E. Mann and C. J. Green, *Circ Res*, 2002, **90**, E17-24.
2. B. E. Mann, *Organometallics*, 2012, **31**, 5728–5735.
3. J. E. Clark, P. Naughton, S. Shurey, C. J. Green, T. R. Johnson, B. E. Mann, R. Foresti and R. Motterlini, *Circ Res*, 2003, **93**, e2-8.
4. T. Santos-Silva, A. Mukhopadhyay, J. D. Seixas, G. J. Bernardes, C. C. Romao and M. J. Romao, *J Am Chem Soc*, 2011, **133**, 1192-1195.
5. T. R. Johnson, B. E. Mann, I. P. Teasdale, H. Adams, R. Foresti, C. J. Green and R. Motterlini, *Dalton Trans*, 2007, 1500-1508.
6. R. Cini, S. Defazio, G. Tamasi, M. Casolaro, L. Messori, A. Casini, M. Morpurgo and M. Hursthouse, *Inorganic Chemistry*, 2007, **46**, 79-92.
7. D. Valensin, P. Anzini, E. Gaggelli, N. Gaggelli, G. Tamasi, R. Cini, C. Gabbiani, E. Michelucci, L. Messori, H. Kozlowski and G. Valensin, *Inorg Chem*, 2010, **49**, 4720-4722.
8. M. F. Santos, J. D. Seixas, A. C. Coelho, A. Mukhopadhyay, P. M. Reis, M. J. Romão, R. C. C and S.-S. T, *J Inorg Biochem*, 2012, **117**, 285–291.
9. J. D. Seixas, Ph.D., New University of Lisbon, 2011.
10. J. D. Seixas, A. Mukhopadhyay, T. Santos-Silva, L. E. Otterbein, D. J. Gallo, S. S. Rodrigues, B. H. Guerreiro, A. M. Goncalves, N. Penacho, A. R. Marques, A. C. Coelho, P. M. Reis, M. J. Romao and C. C. Romao, *Dalton Trans*, 2013, **42**, 5985-5998.

11. M. A. Gonzalez, N. L. Fry, R. Burt, R. Davda, A. Hobbs and P. K. Mascharak, *InorgChem*, 2011, **50** 3127–3134.
